# Supplementary material for: Impact of Maternal Mediterranean-Type Diet Adherence on Microbiota Composition and Epigenetic Programming of Offspring
Source: MDPI journal article supplement (doi:10.3390/nu16010047), 2023-12-22

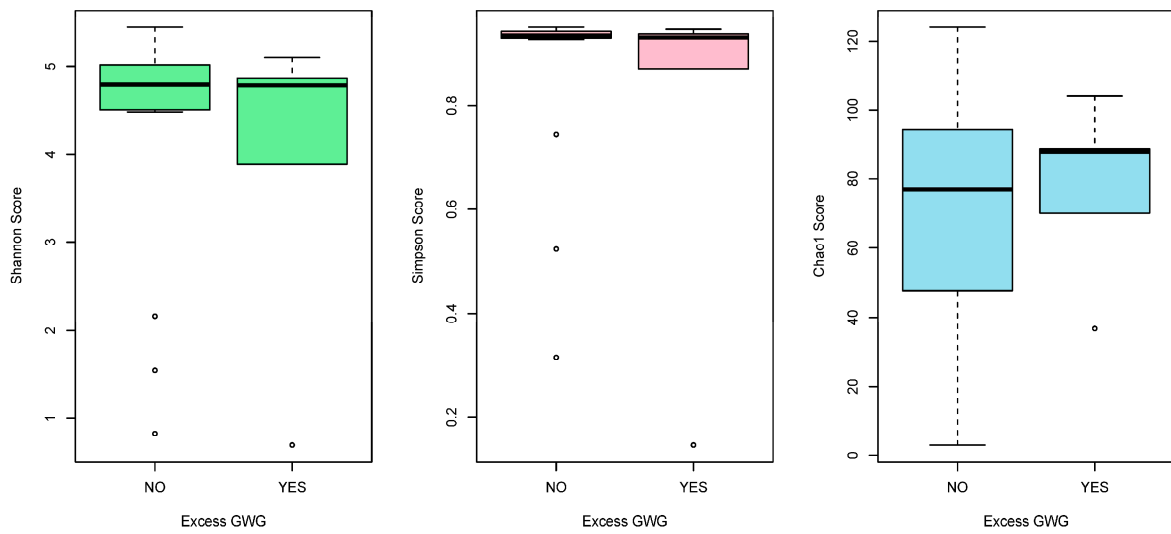

**Figure S1.** Alpha diversity (Chao 1, Shannon, and Simpson) comparison between participants with excess gestational weight gain. There were no statistically significant differences between the two groups ( $p$  values: Chao1 = 0.68, Shannon = 0.71, Simpson = 0.60).

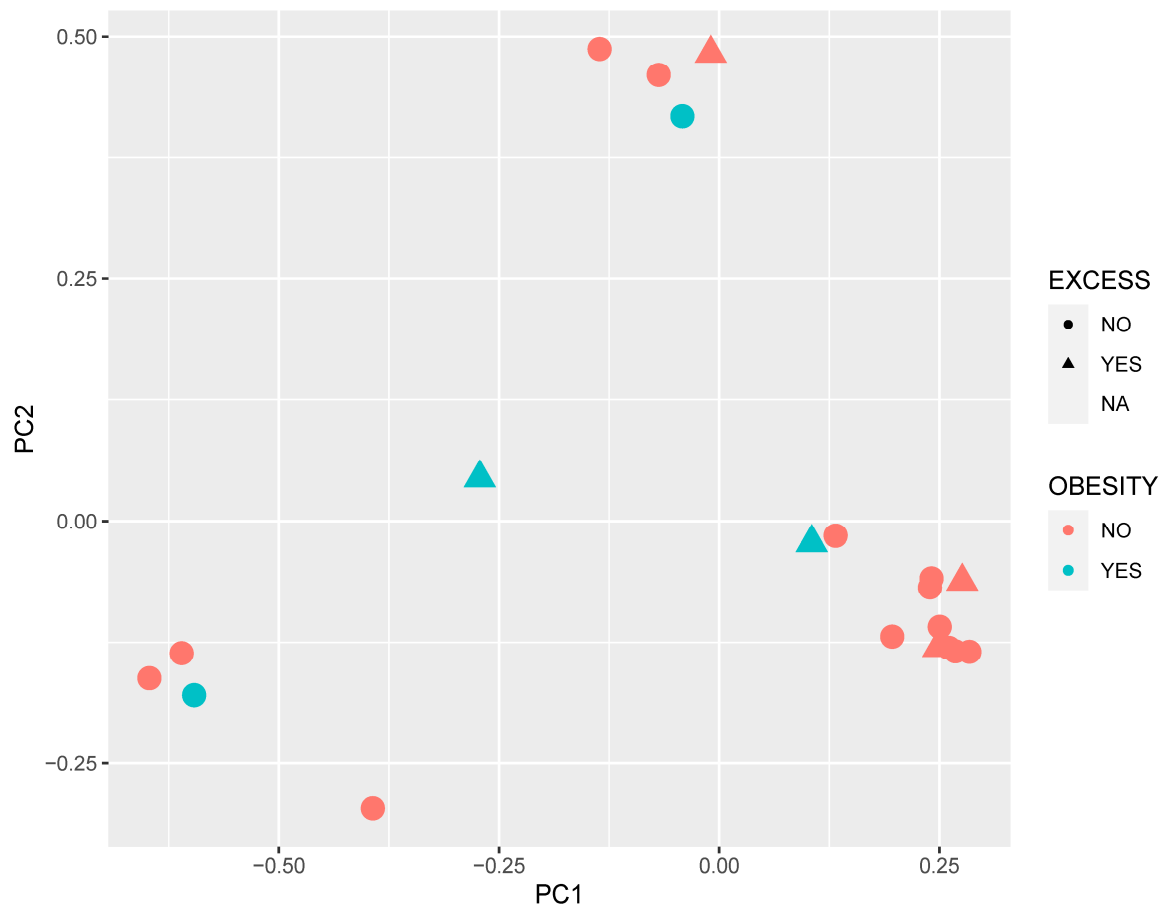

Supplement: s1 [file s1]
